# Supplementary material for: Risk Factors Associated with Outcomes of Recombinant Tissue Plasminogen Activator Therapy in Patients with Acute Ischemic Stroke
Source: PubMed Central journal article supplement (PMC7014350; doi:10.3390/ijerph17020618), 2020-01-18
Supplement: ijerph-17-00618-s001.pdf [file ijerph-17-00618-s001.pdf]

## Supplementary Materials

**Table S1.** The standardized residuals of stroke severity.

| Stroke Severity | Favorable Outcome (n = 546) | Poor Outcome (n = 106) |
|-----------------|-----------------------------|------------------------|
| Mild            | 1.226                       | -1.226                 |
| Moderate        | 7.248                       | -7.248                 |
| Severe          | -8.792                      | 8.792                  |

**Table S2.** Univariate analysis of the patients in the sensitivity analysis–outcome definition.

| Patient Characteristics                               | Favorable Outcome (n = 591) | Poor Outcome (n = 61)     | p Value    |
|-------------------------------------------------------|-----------------------------|---------------------------|------------|
| Sex (%)                                               |                             |                           | 0.013 *    |
| Male                                                  | 382 (64.6)                  | 29 (47.5)                 |            |
| Female                                                | 209 (35.4)                  | 32 (52.5)                 |            |
| Age (median [IQR <sup>a</sup> , Q1–Q3 <sup>b</sup> ]) | 66.00 [18, 56.00–74.00]     | 72.00 [15, 63.00–78.00]   | 0.001 *    |
| SSI <sup>c</sup> (median [IQR, Q1–Q3])                | 9.65 [3.51, 8.28–11.79]     | 21.17 [5.28, 18.03–23.31] | <0.001 *** |
| Stroke severity (%)                                   |                             |                           | <0.001 *** |
| Mild                                                  | 113 (19.1)                  | 0 (0.0)                   |            |
| Moderate                                              | 331 (56.0)                  | 2 (3.3)                   |            |
| Severe                                                | 147 (24.9)                  | 59 (96.7)                 |            |

\*  $p < 0.05$ , \*\*\*  $p < 0.001$ , <sup>a</sup> IQR, interquartile range [first quartile, third quartile], <sup>b</sup> Q1–Q3, quartile 1–3, <sup>c</sup> Stroke severity index.

**Table S3.** Univariate analysis of the laboratory results in the sensitivity analysis–outcome definition.

| Laboratory Tests                                                       | Favorable Outcome (n = 591) | Poor Outcome (n = 61)        | p-Value  |
|------------------------------------------------------------------------|-----------------------------|------------------------------|----------|
| Creatinine (median [IQR <sup>a</sup> , Q1–Q3 <sup>b</sup> ])           | 0.93 [0.36, 0.78–1.14]      | 1.01 [0.45, 0.80–1.25]       | 0.123    |
| Hemoglobin (median [IQR, Q1–Q3])                                       | 14.10 [2.3, 13.00–15.30]    | 13.60 [2.3, 12.30–14.60]     | 0.011 *  |
| Hematocrit (median [IQR, Q1–Q3])                                       | 41.70 [5.8, 38.70–44.50]    | 40.70 [6.9, 36.60–43.50]     | 0.053    |
| MCH (mean corpuscular hemoglobin) (median [IQR, Q1–Q3])                | 30.50 [2.4, 29.30–31.70]    | 30.60 [2.8, 29.00–31.80]     | 0.892    |
| MCHC (mean corpuscular hemoglobin concentration) (median [IQR, Q1–Q3]) | 33.90 [1.5, 33.20–34.70]    | 33.40 [1.9, 32.60–34.50]     | 0.019 *  |
| MCV (mean corpuscular volume) (median [IQR, Q1–Q3])                    | 89.60 [5.9, 86.60–92.50]    | 90.80 [6.4, 86.70–93.10]     | 0.262    |
| Sodium (median [IQR, Q1–Q3])                                           | 139.00 [3.8, 137.20–141.00] | 138.60 [3, 137.00–140.00]    | 0.105    |
| Platelets (median [IQR, Q1–Q3])                                        | 205.00 [69, 169.00–238.00]  | 193.00 [69, 165.00–234.00]   | 0.248    |
| RBCs (red blood cells) (median [IQR, Q1–Q3])                           | 4.70 [0.67, 4.36–5.03]      | 4.55 [0.88, 4.09–4.97]       | 0.035 *  |
| RDW (red cell distribution width) (median [IQR, Q1–Q3])                | 13.50 [3, 12.90–15.90]      | 14.20 [7, 12.90–19.90]       | 0.151    |
| WBCs (white blood cells) (median [IQR, Q1–Q3])                         | 7.80 [3.5, 6.40–9.90]       | 7.70 [2.9, 6.60–9.50]        | 0.815    |
| ALT (alanine aminotransferase) (median [IQR, Q1–Q3])                   | 23.00 [15, 17.00–32.00]     | 22.00 [14, 16.00–30.00]      | 0.329    |
| Glucose (median [IQR, Q1–Q3])                                          | 130.00 [49, 111.00–160.00]  | 145.00 [55.5, 122.00–177.50] | 0.006 ** |
| Potassium (median [IQR, Q1–Q3])                                        | 3.70 [0.49, 3.44–3.93]      | 3.83 [0.5, 3.60–4.10]        | 0.003 ** |

\*  $p < 0.05$ , \*\*  $p < 0.01$ , <sup>a</sup> IQR, interquartile range, <sup>b</sup> Q1–Q3, quartile 1–3.

**Table S4.** Univariate analysis of the medical history variables in the sensitivity analysis–outcome definition.

| Medical Histories (%)                  | Favorable Outcome (n = 591) | Poor Outcome (n = 61) | <i>p</i> Value |
|----------------------------------------|-----------------------------|-----------------------|----------------|
| Deficiency anemias                     | 13 (2.2)                    | 4 (6.6)               | 0.107          |
| Congestive heart failure               | 42 (7.1)                    | 7 (11.5)              | 0.328          |
| Diabetes without chronic complications | 91 (15.4)                   | 10 (16.4)             | 0.985          |
| Hypertension, uncomplicated            | 198 (33.5)                  | 22 (36.1)             | 0.794          |
| Hypertension, complicated              | 21 (3.6)                    | 6 (9.8)               | 0.045 *        |
| Liver disease                          | 33 (5.6)                    | 3 (4.9)               | 1              |
| Chronic pulmonary disease              | 52 (8.8)                    | 5 (8.2)               | 1              |
| Solid tumor without metastasis         | 30 (5.1)                    | 7 (11.5)              | 0.077          |
| Valvular disease                       | 36 (6.1)                    | 6 (9.8)               | 0.39           |

\*  $p < 0.05$ .

**Table S5.** Univariate analysis of laboratory categorical variables in the sensitivity analysis–transformed laboratory test results.

| Laboratory Tests                                     | Favorable Outcome (n = 546) | Poor Outcome (n = 106) | <i>p</i> Value  |
|------------------------------------------------------|-----------------------------|------------------------|-----------------|
| Creatinine (%)                                       |                             |                        | <b>0.06</b>     |
| High                                                 | 96 (17.8)                   | 29 (27.9)              |                 |
| Low                                                  | 7 (1.3)                     | 1 (1.0)                |                 |
| Normal                                               | 436 (80.9)                  | 74 (71.2)              |                 |
| Hemoglobin (%)                                       |                             |                        | <b>0.015 *</b>  |
| High                                                 | 15 (2.8)                    | 6 (5.7)                |                 |
| Low                                                  | 117 (21.5)                  | 33 (31.4)              |                 |
| Normal                                               | 413 (75.8)                  | 66 (62.9)              |                 |
| Hematocrit (%)                                       |                             |                        | <b>0.011 *</b>  |
| High                                                 | 7 (1.3)                     | 6 (5.7)                |                 |
| Low                                                  | 148 (27.2)                  | 33 (31.4)              |                 |
| Normal                                               | 390 (71.6)                  | 66 (62.9)              |                 |
| MCH (mean corpuscular hemoglobin) (%)                |                             |                        | <b>0.482</b>    |
| High                                                 | 15 (2.8)                    | 3 (2.9)                |                 |
| Low                                                  | 40 (7.3)                    | 11 (10.5)              |                 |
| Normal                                               | 490 (89.9)                  | 91 (86.7)              |                 |
| MCHC (mean corpuscular hemoglobin concentration) (%) |                             |                        | <b>0.837</b>    |
| High                                                 | 4 (0.7)                     | 0 (0.0)                |                 |
| Low                                                  | 8 (1.5)                     | 2 (1.9)                |                 |
| Normal                                               | 533 (97.8)                  | 103 (98.1)             |                 |
| MCV (mean corpuscular volume) (%)                    |                             |                        | <b>0.366</b>    |
| High                                                 | 14 (2.6)                    | 5 (4.8)                |                 |
| Low                                                  | 41 (7.5)                    | 9 (8.6)                |                 |
| Normal                                               | 490 (89.9)                  | 91 (86.7)              |                 |
| Sodium (%)                                           |                             |                        | <b>0.005 **</b> |
| Low                                                  | 13 (2.4)                    | 9 (8.5)                |                 |
| Normal                                               | 531 (97.6)                  | 97 (91.5)              |                 |
| Platelets (%)                                        |                             |                        | <b>0.121</b>    |
| High                                                 | 7 (1.3)                     | 2 (1.9)                |                 |
| Low                                                  | 63 (11.6)                   | 19 (18.1)              |                 |
| Normal                                               | 475 (87.2)                  | 84 (80.0)              |                 |
| RBCs (red blood cells) (%)                           |                             |                        | <b>0.013 *</b>  |
| High                                                 | 14 (2.6)                    | 7 (6.7)                |                 |
| Low                                                  | 80 (14.7)                   | 23 (21.9)              |                 |
| Normal                                               | 451 (82.8)                  | 75 (71.4)              |                 |

|                                       |            |           |               |
|---------------------------------------|------------|-----------|---------------|
| RDW (red cell distribution width) (%) |            |           | 1             |
| High                                  | 184 (33.8) | 35 (33.3) |               |
| Normal                                | 361 (66.2) | 70 (66.7) |               |
| WBCs (white blood cells) (%)          |            |           | <b>0.299</b>  |
| High                                  | 108 (19.8) | 19 (18.1) |               |
| Low                                   | 3 (0.6)    | 2 (1.9)   |               |
| Normal                                | 434 (79.6) | 84 (80.0) |               |
| ALT (Alanine aminotransferase) (%)    |            |           | 0.386         |
| High                                  | 95 (17.9)  | 23 (22.1) |               |
| Normal                                | 435 (82.1) | 81 (77.9) |               |
| Glucose (%)                           |            |           | <b>0.01 *</b> |
| High                                  | 188 (37.2) | 49 (52.7) |               |
| Low                                   | 1 (0.2)    | 0 (0.0)   |               |
| Normal                                | 317 (62.6) | 44 (47.3) |               |
| Potassium (%)                         |            |           | <b>0.128</b>  |
| High                                  | 4 (0.7)    | 1 (1.0)   |               |
| Low                                   | 191 (35.3) | 27 (26.0) |               |
| Normal                                | 346 (64.0) | 76 (73.1) |               |

\*  $p < 0.05$ , \*\*  $p < 0.01$  Note. The  $p$  value printed in bold uses Fisher's exact test; otherwise, the chi-square test.

**Table S6.** Risk factors identified by the Lasso model (lambda: 0.01072267) and their associated coefficients in the sensitivity analyses–transformed laboratory test results.

| Selected Variables | Coefficient |
|--------------------|-------------|
| Anemia             | 0.776       |
| Sex: Male          | -0.205      |
| SSI                | 0.828       |
| Hemoglobin: High   | 0.954       |
| Hemoglobin: Low    | 0.002       |
| Hematocrit: High   | 0.377       |
| Sodium: Low        | 0.886       |
| Glucose: High      | 0.306       |
